# Supplementary material for: High Pressure and Pasteurization Effects on Dairy Cream
Source: MDPI journal article supplement (doi:10.3390/foods12193640), 2023-10-01
Supplement: s1 [file s1]

**Table S1:** pH and colour analysis of the different treatment condition (heat, 450/5 and 600/5) of the initial cream and right after processing (0 d) and after 3 (3 d), 10 (10 d), 28 (28 d) and 52 (52 d) days of storage at 4 °C. Results are presented as mean  $\pm$  standard deviation. Different letters represent statistically differences ( $p < 0.05$ ) between storage days for each condition (A-B) and between treatment conditions for each storage day (a-b).

| Storage time<br>(days) | Conditions    | pH                    | $L^*$                 | $a^*$                 | $b^*$                 | $\Delta E^*$         |
|------------------------|---------------|-----------------------|-----------------------|-----------------------|-----------------------|----------------------|
| 0                      | Initial       | $6.74 \pm 0.05^{aA}$  | $47.3 \pm 0.32^{aA}$  | $-0.05 \pm 0.11^{aA}$ | $4.80 \pm 0.32^{aA}$  |                      |
|                        | Heat-treated  | $6.93 \pm 0.01^{aA}$  | $48.5 \pm 0.98^{aA}$  | $-0.09 \pm 0.15^{aA}$ | $4.97 \pm 0.98^{aA}$  | $1.48 \pm 0.60^{aA}$ |
|                        | 450 MPa/5 min | $7.00 \pm 0.02^{bA}$  | $49.0 \pm 0.16^{aA}$  | $0.31 \pm 0.04^{aB}$  | $5.04 \pm 0.16^{aA}$  | $2.19 \pm 2.23^{aA}$ |
|                        | 600 MPa/5 min | $6.86 \pm 0.03^{abA}$ | $48.6 \pm 0.08^{aA}$  | $0.19 \pm 0.04^{aB}$  | $5.19 \pm 0.08^{aA}$  | $1.43 \pm 1.00^{aA}$ |
| 5                      | Heat-treated  | $6.83 \pm 0.02^{aA}$  | $50.9 \pm 2.20^{aA}$  | $0.11 \pm 0.08^{abA}$ | $6.67 \pm 0.40^{bA}$  | $4.12 \pm 0.87^{aA}$ |
|                        | 450 MPa/5 min | $6.95 \pm 0.03^{bA}$  | $49.5 \pm 0.85^{aA}$  | $0.51 \pm 0.02^{abB}$ | $6.11 \pm 0.16^{abA}$ | $2.87 \pm 2.26^{aA}$ |
|                        | 600 MPa/5 min | $7.06 \pm 0.12^{bA}$  | $51.5 \pm 0.81^{abA}$ | $0.47 \pm 0.01^{bB}$  | $6.58 \pm 0.13^{bA}$  | $4.85 \pm 2.68^{aA}$ |
| 9                      | Heat-treated  | $6.89 \pm 0.35^{aA}$  | $52.1 \pm 1.70^{aA}$  | $0.15 \pm 0.08^{bA}$  | $6.83 \pm 0.30^{bA}$  | $5.29 \pm 1.77^{aA}$ |
|                        | 450 MPa/5 min | $6.94 \pm 0.20^{bA}$  | $51.4 \pm 0.33^{aA}$  | $0.60 \pm 0.02^{bB}$  | $6.58 \pm 0.08^{bA}$  | $4.64 \pm 1.98^{aA}$ |
|                        | 600 MPa/5 min | $6.86 \pm 0.20^{abA}$ | $53.5 \pm 2.37^{abA}$ | $0.53 \pm 0.03^{bB}$  | $6.91 \pm 0.32^{bA}$  | $6.66 \pm 1.58^{aA}$ |
| 18                     | Heat-treated  | $6.85 \pm 0.18^{aA}$  | $52.7 \pm 0.96^{aA}$  | $0.17 \pm 0.04^{bA}$  | $6.92 \pm 0.20^{bA}$  | $5.88 \pm 2.86^{aA}$ |
|                        | 450 MPa/5 min | $6.66 \pm 0.12^{aA}$  | $52.0 \pm 0.75^{aA}$  | $0.56 \pm 0.04^{bB}$  | $6.64 \pm 0.08^{bA}$  | $5.20 \pm 1.55^{aA}$ |
|                        | 600 MPa/5 min | $6.67 \pm 0.05^{aA}$  | $53.3 \pm 2.15^{abA}$ | $0.41 \pm 0.03^{abB}$ | $6.88 \pm 0.24^{bA}$  | $6.40 \pm 1.01^{aA}$ |
| 33                     | Heat-treated  | $6.64 \pm 0.05^{aA}$  | $51.4 \pm 0.96^{aA}$  | $0.04 \pm 0.03^{abA}$ | $6.70 \pm 0.13^{bA}$  | $4.86 \pm 2.51^{aA}$ |
|                        | 450 MPa/5 min | –                     | –                     | –                     | –                     | –                    |
|                        | 600 MPa/5 min | $6.66 \pm 0.02^{aA}$  | $53.4 \pm 1.40^{abA}$ | $0.35 \pm 0.07^{abB}$ | $7.07 \pm 0.24^{bA}$  | $6.62 \pm 1.00^{aA}$ |
| 51                     | Heat-treated  | $6.69 \pm 0.22^{aA}$  | $53.6 \pm 2.00^{aA}$  | $0.17 \pm 0.09^{bA}$  | $7.26 \pm 0.36^{bA}$  | $8.01 \pm 3.71^{aA}$ |
|                        | 450 MPa/5 min | –                     | –                     | –                     | –                     | –                    |
|                        | 600 MPa/5 min | $6.62 \pm 0.05^{aA}$  | $55.2 \pm 0.39^{bA}$  | $0.54 \pm 0.01^{bB}$  | $7.45 \pm 0.04^{bA}$  | $8.43 \pm 2.60^{aA}$ |

**Table S2:** pH and colour analysis of the different treatment condition (heat, 600/5 and 600/15) of the initial cream and right after processing (0 d) and after 3 (3 d), 10 (10 d), 28 (28 d) and 52 (52 d) days of storage at 4 °C. Results are presented as mean  $\pm$  standard deviation. Different letters represent statistically differences ( $p < 0.05$ ) between storage days for each condition (A-C) and between treatment conditions for each storage day (a-b).

| Storage time<br>(days) | Conditions     | pH                   | $L^*$                 | $a^*$                 | $b^*$                 | $\Delta E^*$         |
|------------------------|----------------|----------------------|-----------------------|-----------------------|-----------------------|----------------------|
| 0                      | Initial        | $6.91 \pm 0.14^{aA}$ | $51.0 \pm 0.27^{aA}$  | $0.42 \pm 0.05^{aC}$  | $6.16 \pm 0.27^{aA}$  |                      |
|                        | Heat-treated   | $6.75 \pm 0.01^{bA}$ | $50.2 \pm 0.12^{aA}$  | $-0.08 \pm 0.00^{aA}$ | $6.15 \pm 0.12^{aA}$  | $1.40 \pm 1.08^{aA}$ |
|                        | 600 MPa/15 min | $6.88 \pm 0.05^{bA}$ | $50.7 \pm 0.16^{aA}$  | $0.25 \pm 0.02^{abB}$ | $6.63 \pm 0.16^{aA}$  | $2.51 \pm 1.49^{aA}$ |
| 3                      | Heat-treated   | $6.66 \pm 0.07^{bA}$ | $54.1 \pm 2.06^{aA}$  | $0.12 \pm 0.08^{bA}$  | $7.08 \pm 0.40^{bA}$  | $4.72 \pm 2.15^{aA}$ |
|                        | 600 MPa/15 min | $6.92 \pm 0.08^{bB}$ | $52.0 \pm 0.48^{abA}$ | $0.33 \pm 0.06^{bB}$  | $6.65 \pm 0.05^{aA}$  | $1.72 \pm 0.91^{aA}$ |
| 10                     | Heat-treated   | $6.44 \pm 0.01^{aA}$ | $52.4 \pm 0.97^{aA}$  | $0.06 \pm 0.03^{abA}$ | $6.80 \pm 0.24^{abA}$ | $3.09 \pm 1.31^{aA}$ |
|                        | 600 MPa/15 min | $6.60 \pm 0.10^{aA}$ | $52.0 \pm 1.03^{abA}$ | $0.35 \pm 0.03^{bB}$  | $6.79 \pm 0.19^{aA}$  | $2.94 \pm 1.32^{aA}$ |
| 28                     | Heat-treated   | $6.66 \pm 0.16^{bA}$ | $53.8 \pm 1.50^{aA}$  | $0.16 \pm 0.05^{bA}$  | $7.09 \pm 0.26^{bA}$  | $4.15 \pm 1.57^{aA}$ |
|                        | 600 MPa/15 min | $6.54 \pm 0.03^{aA}$ | $56.5 \pm 3.11^{bA}$  | $0.38 \pm 0.05^{bB}$  | $7.45 \pm 0.40^{aA}$  | $5.79 \pm 4.78^{aA}$ |
| 52                     | Heat-treated   | —                    | —                     | —                     | —                     | —                    |
|                        | 600 MPa/15 min | $6.62 \pm 0.02^{aA}$ | $53.6 \pm 0.54^{abA}$ | $0.13 \pm 0.03^{aA}$  | $7.14 \pm 0.04^{aA}$  | $3.01 \pm 2.00^{aA}$ |

**Table S3:** Cream fatty acids composition (% of total fatty acids), at different treatment condition (heat, 600/5 and 600/15) of the initial cream and right after processing (0 d) and after 3 (3 d), 10 (10 d), 28 (28 d) and 52 (52 d) days of storage at 4 °C. Results are presented as mean ± standard deviation. Different letters represent statistically differences (p<0.05) between storage days for each condition (A-B) and between treatment conditions for each storage day (a-b).

| Fatty acids     | Day 0                      |                             |                             |                            | Day 3                      |                            |                            | Day 10                     |                             |                            | Day 28                     |                            |                            | Day 52                     |                            |                            |
|-----------------|----------------------------|-----------------------------|-----------------------------|----------------------------|----------------------------|----------------------------|----------------------------|----------------------------|-----------------------------|----------------------------|----------------------------|----------------------------|----------------------------|----------------------------|----------------------------|----------------------------|
|                 | Initial                    | Heat-treated                | 600 MPa/5 min               | 600 MPa/15 min             | Heat-treated               | 600 MPa/5 min              | 600 MPa/15 min             | Heat-treated               | 600 MPa/5 min               | 600 MPa/15 min             | Heat-treated               | 600 MPa/5 min              | 600 MPa/15 min             | Heat-treated               | 600 MPa/5 min              | 600 MPa/15 min             |
| C4:0            | 3.47 ± 0.05 <sup>aA</sup>  | 3.01 ± 0.42 <sup>aA</sup>   | 3.29 ± 0.23 <sup>aA</sup>   | 3.40 ± 0.03 <sup>aA</sup>  | 3.19 ± 0.09 <sup>aA</sup>  | 3.26 ± 0.17 <sup>aA</sup>  | 3.12 ± 0.13 <sup>aA</sup>  | 3.15 ± 0.26 <sup>aA</sup>  | 2.89 ± 0.66 <sup>aA</sup>   | 2.75 ± 0.36 <sup>aA</sup>  | 2.55 ± 0.02 <sup>aA</sup>  | 3.13 ± 0.21 <sup>aA</sup>  | 3.40 ± 0.02 <sup>aA</sup>  | 3.25 ± 0.04 <sup>aA</sup>  | 3.10 ± 0.03 <sup>aA</sup>  | 2.97 ± 0.03 <sup>aA</sup>  |
| C6:0            | 2.78 ± 0.01 <sup>aA</sup>  | 2.56 ± 0.10 <sup>aA</sup>   | 2.69 ± 0.03 <sup>aA</sup>   | 2.64 ± 0.02 <sup>aA</sup>  | 2.68 ± 0.02 <sup>aA</sup>  | 2.72 ± 0.05 <sup>aA</sup>  | 2.72 ± 0.05 <sup>aA</sup>  | 2.73 ± 0.06 <sup>aA</sup>  | 2.69 ± 0.20 <sup>aA</sup>   | 2.55 ± 0.24 <sup>aA</sup>  | 2.38 ± 0.17 <sup>aA</sup>  | 2.56 ± 0.10 <sup>aA</sup>  | 2.65 ± 0.01 <sup>aA</sup>  | 2.61 ± 0.01 <sup>aA</sup>  | 2.60 ± 0.02 <sup>aA</sup>  | 2.59 ± 0.02 <sup>aA</sup>  |
| C8:0            | 1.55 ± 0.01 <sup>aA</sup>  | 1.46 ± 0.02 <sup>aA</sup>   | 1.50 ± 0.02 <sup>aA</sup>   | 1.46 ± 0.02 <sup>aA</sup>  | 1.50 ± 0.01 <sup>aA</sup>  | 1.52 ± 0.02 <sup>aA</sup>  | 1.55 ± 0.01 <sup>aA</sup>  | 1.54 ± 0.02 <sup>aA</sup>  | 1.55 ± 0.07 <sup>aA</sup>   | 1.47 ± 0.10 <sup>aA</sup>  | 1.38 ± 0.10 <sup>aA</sup>  | 1.44 ± 0.04 <sup>aA</sup>  | 1.47 ± 0.01 <sup>aA</sup>  | 1.46 ± 0.00 <sup>aA</sup>  | 1.46 ± 0.01 <sup>aA</sup>  | 1.47 ± 0.01 <sup>aA</sup>  |
| C10:0           | 3.35 ± 0.02 <sup>aA</sup>  | 3.16 ± 0.02 <sup>aA</sup>   | 3.19 ± 0.04 <sup>aA</sup>   | 3.12 ± 0.04 <sup>aA</sup>  | 3.23 ± 0.02 <sup>aA</sup>  | 3.26 ± 0.05 <sup>aA</sup>  | 3.31 ± 0.03 <sup>aA</sup>  | 3.29 ± 0.03 <sup>aA</sup>  | 3.32 ± 0.11 <sup>aA</sup>   | 3.23 ± 0.17 <sup>aA</sup>  | 3.05 ± 0.14 <sup>aA</sup>  | 3.15 ± 0.02 <sup>aA</sup>  | 3.15 ± 0.01 <sup>aA</sup>  | 3.15 ± 0.01 <sup>aA</sup>  | 3.14 ± 0.04 <sup>aA</sup>  | 3.16 ± 0.01 <sup>aA</sup>  |
| C10:1           | 0.39 ± 0.00 <sup>aA</sup>  | 0.37 ± 0.00 <sup>aA</sup>   | 0.38 ± 0.01 <sup>aA</sup>   | 0.37 ± 0.00 <sup>aA</sup>  | 0.38 ± 0.00 <sup>aA</sup>  | 0.39 ± 0.01 <sup>aA</sup>  | 0.40 ± 0.01 <sup>aA</sup>  | 0.39 ± 0.00 <sup>aA</sup>  | 0.40 ± 0.01 <sup>aA</sup>   | 0.39 ± 0.02 <sup>aA</sup>  | 0.36 ± 0.02 <sup>aA</sup>  | 0.38 ± 0.00 <sup>aA</sup>  | 0.38 ± 0.00 <sup>aA</sup>  | 0.37 ± 0.00 <sup>aA</sup>  | 0.37 ± 0.00 <sup>aA</sup>  | 0.37 ± 0.00 <sup>aA</sup>  |
| C12:0           | 4.04 ± 0.03 <sup>aB</sup>  | 3.73 ± 0.01 <sup>aA</sup>   | 3.74 ± 0.04 <sup>aA</sup>   | 3.69 ± 0.03 <sup>aA</sup>  | 3.78 ± 0.03 <sup>aA</sup>  | 3.80 ± 0.05 <sup>aA</sup>  | 3.83 ± 0.02 <sup>aA</sup>  | 3.82 ± 0.04 <sup>aA</sup>  | 3.87 ± 0.07 <sup>aA</sup>   | 3.91 ± 0.16 <sup>aA</sup>  | 3.68 ± 0.07 <sup>aA</sup>  | 3.76 ± 0.05 <sup>aA</sup>  | 3.72 ± 0.00 <sup>aA</sup>  | 3.72 ± 0.00 <sup>aA</sup>  | 3.72 ± 0.04 <sup>aA</sup>  | 3.75 ± 0.02 <sup>aA</sup>  |
| C14:0           | 11.25 ± 0.07 <sup>aA</sup> | 11.16 ± 0.04 <sup>aA</sup>  | 11.13 ± 0.05 <sup>aA</sup>  | 11.14 ± 0.06 <sup>aA</sup> | 11.21 ± 0.03 <sup>aA</sup> | 11.25 ± 0.12 <sup>aA</sup> | 11.32 ± 0.01 <sup>aA</sup> | 11.29 ± 0.13 <sup>aA</sup> | 11.42 ± 0.12 <sup>aAB</sup> | 11.74 ± 0.31 <sup>aB</sup> | 11.08 ± 0.05 <sup>aA</sup> | 11.33 ± 0.20 <sup>aA</sup> | 11.19 ± 0.00 <sup>aA</sup> | 11.24 ± 0.02 <sup>aA</sup> | 11.18 ± 0.08 <sup>aA</sup> | 11.28 ± 0.04 <sup>aA</sup> |
| C14:1t          | 0.35 ± 0.01 <sup>aA</sup>  | 0.37 ± 0.03 <sup>aA</sup>   | 0.33 ± 0.07 <sup>aA</sup>   | 0.22 ± 0.12 <sup>aA</sup>  | 0.34 ± 0.03 <sup>aA</sup>  | 0.31 ± 0.07 <sup>aA</sup>  | 0.38 ± 0.02 <sup>aA</sup>  | 0.37 ± 0.01 <sup>aA</sup>  | 0.28 ± 0.08 <sup>aA</sup>   | 0.37 ± 0.01 <sup>aA</sup>  | 0.37 ± 0.02 <sup>aA</sup>  | 0.27 ± 0.14 <sup>aA</sup>  | 0.35 ± 0.01 <sup>aA</sup>  | 0.20 ± 0.12 <sup>aA</sup>  | 0.35 ± 0.01 <sup>aA</sup>  | 0.34 ± 0.01 <sup>aA</sup>  |
| C14:1           | 1.23 ± 0.00 <sup>aA</sup>  | 1.25 ± 0.01 <sup>aA</sup>   | 1.25 ± 0.01 <sup>aA</sup>   | 1.24 ± 0.01 <sup>aA</sup>  | 1.28 ± 0.02 <sup>aA</sup>  | 1.25 ± 0.02 <sup>aA</sup>  | 1.27 ± 0.01 <sup>aA</sup>  | 1.26 ± 0.01 <sup>aA</sup>  | 1.26 ± 0.01 <sup>aA</sup>   | 1.31 ± 0.03 <sup>aA</sup>  | 1.24 ± 0.00 <sup>aA</sup>  | 1.24 ± 0.00 <sup>aA</sup>  | 1.25 ± 0.00 <sup>aA</sup>  | 1.24 ± 0.00 <sup>aA</sup>  | 1.23 ± 0.01 <sup>aA</sup>  | 1.23 ± 0.00 <sup>aA</sup>  |
| ai-C15:0        | 0.66 ± 0.00 <sup>aA</sup>  | 0.73 ± 0.01 <sup>aB</sup>   | 0.73 ± 0.00 <sup>aB</sup>   | 0.72 ± 0.00 <sup>aB</sup>  | 0.76 ± 0.02 <sup>aB</sup>  | 0.72 ± 0.01 <sup>aA</sup>  | 0.73 ± 0.00 <sup>aA</sup>  | 0.73 ± 0.01 <sup>aA</sup>  | 0.73 ± 0.00 <sup>aA</sup>   | 0.75 ± 0.01 <sup>aA</sup>  | 0.73 ± 0.00 <sup>aA</sup>  | 0.73 ± 0.01 <sup>aA</sup>  | 0.72 ± 0.00 <sup>aA</sup>  |
| C15:0           | 1.07 ± 0.00 <sup>aA</sup>  | 1.10 ± 0.01 <sup>aA</sup>   | 1.09 ± 0.01 <sup>aA</sup>   | 1.09 ± 0.01 <sup>aA</sup>  | 1.10 ± 0.00 <sup>aA</sup>  | 1.10 ± 0.01 <sup>aA</sup>  | 1.10 ± 0.00 <sup>aA</sup>  | 1.10 ± 0.01 <sup>aA</sup>  | 1.11 ± 0.00 <sup>aAB</sup>  | 1.14 ± 0.02 <sup>aB</sup>  | 1.11 ± 0.01 <sup>aA</sup>  | 1.11 ± 0.01 <sup>aA</sup>  | 1.09 ± 0.00 <sup>aA</sup>  | 1.10 ± 0.01 <sup>aA</sup>  | 1.10 ± 0.01 <sup>aA</sup>  | 1.10 ± 0.00 <sup>aA</sup>  |
| i-C16:0         | 0.33 ± 0.01 <sup>aA</sup>  | 0.36 ± 0.01 <sup>aB</sup>   | 0.36 ± 0.00 <sup>aB</sup>   | 0.35 ± 0.00 <sup>aB</sup>  | 0.37 ± 0.01 <sup>aB</sup>  | 0.36 ± 0.01 <sup>aAB</sup> | 0.35 ± 0.00 <sup>aA</sup>  | 0.36 ± 0.00 <sup>aA</sup>  | 0.36 ± 0.00 <sup>aA</sup>   | 0.37 ± 0.01aA              | 0.36 ± 0.00 <sup>aA</sup>  | 0.36 ± 0.00 <sup>aA</sup>  | 0.35 ± 0.00 <sup>aA</sup>  | 0.35 ± 0.00 <sup>aA</sup>  | 0.36 ± 0.00 <sup>aA</sup>  | 0.36 ± 0.00 <sup>aA</sup>  |
| C16:0           | 24.50 ± 0.12 <sup>aB</sup> | 23.74 ± 0.13 <sup>aA</sup>  | 23.66 ± 0.06 <sup>aA</sup>  | 23.73 ± 0.10 <sup>aA</sup> | 23.63 ± 0.08 <sup>aA</sup> | 23.77 ± 0.14 <sup>aA</sup> | 23.70 ± 0.05 <sup>aA</sup> | 23.75 ± 0.23 <sup>aA</sup> | 24.00 ± 0.13 <sup>aA</sup>  | 24.20 ± 0.25 <sup>aA</sup> | 24.06 ± 0.15 <sup>aA</sup> | 23.92 ± 0.16 <sup>aA</sup> | 23.76 ± 0.01 <sup>aB</sup> | 23.84 ± 0.08 <sup>aA</sup> | 23.82 ± 0.07 <sup>aA</sup> | 23.92 ± 0.05 <sup>aA</sup> |
| C16:1T          | 0.52 ± 0.01 <sup>aA</sup>  | 0.55 ± 0.03 <sup>aA</sup>   | 0.54 ± 0.00 <sup>aA</sup>   | 0.54 ± 0.02 <sup>aA</sup>  | 0.54 ± 0.02 <sup>aA</sup>  | 0.53 ± 0.04 <sup>aA</sup>  | 0.56 ± 0.03 <sup>aA</sup>  | 0.55 ± 0.02 <sup>aA</sup>  | 0.55 ± 0.02 <sup>aA</sup>   | 0.54 ± 0.02 <sup>aA</sup>  | 0.56 ± 0.02 <sup>aA</sup>  | 0.54 ± 0.02 <sup>aA</sup>  | 0.55 ± 0.02 <sup>aA</sup>  | 0.52 ± 0.03 <sup>aA</sup>  | 0.54 ± 0.04 <sup>aA</sup>  | 0.52 ± 0.01 <sup>aA</sup>  |
| C16:1C          | 2.75 ± 0.02 <sup>aB</sup>  | 2.63 ± 0.03 <sup>aA</sup>   | 2.62 ± 0.00 <sup>aA</sup>   | 2.63 ± 0.01 <sup>aA</sup>  | 2.70 ± 0.06 <sup>aA</sup>  | 2.61 ± 0.02 <sup>aA</sup>  | 2.63 ± 0.01 <sup>aA</sup>  | 2.63 ± 0.03 <sup>aA</sup>  | 2.63 ± 0.02 <sup>aA</sup>   | 2.67 ± 0.01 <sup>aA</sup>  | 2.65 ± 0.03 <sup>aA</sup>  | 2.63 ± 0.02 <sup>aA</sup>  | 2.61 ± 0.00 <sup>aA</sup>  | 2.66 ± 0.07 <sup>aA</sup>  | 2.62 ± 0.01 <sup>aA</sup>  | 2.61 ± 0.01 <sup>aA</sup>  |
| ai-C17:0        | 0.83 ± 0.01 <sup>aA</sup>  | 0.87 ± 0.01 <sup>aB</sup>   | 0.87 ± 0.01 <sup>aB</sup>   | 0.88 ± 0.01 <sup>aB</sup>  | 0.87 ± 0.01 <sup>aA</sup>  | 0.87 ± 0.01 <sup>aA</sup>  | 0.87 ± 0.01 <sup>aA</sup>  | 0.88 ± 0.01 <sup>aA</sup>  | 0.87 ± 0.01 <sup>aA</sup>   | 0.88 ± 0.01 <sup>aA</sup>  | 0.88 ± 0.01 <sup>aA</sup>  | 0.87 ± 0.01 <sup>aA</sup>  | 0.87 ± 0.00 <sup>aA</sup>  |
| C17:0           | 0.63 ± 0.00 <sup>aA</sup>  | 0.64 ± 0.00 <sup>aA</sup>   | 0.63 ± 0.00 <sup>aA</sup>   | 0.65 ± 0.01 <sup>aA</sup>  | 0.66 ± 0.01 <sup>aA</sup>  | 0.64 ± 0.00 <sup>aA</sup>  | 0.64 ± 0.01 <sup>aA</sup>  | 0.64 ± 0.01 <sup>aA</sup>  | 0.64 ± 0.01 <sup>aA</sup>   | 0.65 ± 0.03 <sup>aA</sup>  | 0.66 ± 0.02 <sup>aA</sup>  | 0.65 ± 0.01 <sup>aA</sup>  | 0.64 ± 0.00 <sup>aA</sup>  | 0.65 ± 0.01 <sup>aA</sup>  | 0.64 ± 0.01 <sup>aA</sup>  | 0.65 ± 0.00 <sup>aA</sup>  |
| i-C18:0         | 0.32 ± 0.02 <sup>aA</sup>  | 0.31 ± 0.00 <sup>aA</sup>   | 0.31 ± 0.01 <sup>aA</sup>   | 0.31 ± 0.00 <sup>aA</sup>  | 0.31 ± 0.01 <sup>aA</sup>  | 0.31 ± 0.01 <sup>aA</sup>  | 0.32 ± 0.01 <sup>aA</sup>  | 0.33 ± 0.02 <sup>aA</sup>  | 0.31 ± 0.00 <sup>aA</sup>   | 0.31 ± 0.01 <sup>aA</sup>  | 0.32 ± 0.00 <sup>aA</sup>  | 0.32 ± 0.01 <sup>aA</sup>  | 0.31 ± 0.00 <sup>aA</sup>  |
| C18:0           | 9.26 ± 0.05 <sup>aA</sup>  | 9.91 ± 0.06 <sup>aB</sup>   | 9.79 ± 0.06 <sup>aB</sup>   | 9.91 ± 0.08 <sup>aB</sup>  | 9.79 ± 0.04 <sup>aA</sup>  | 9.76 ± 0.11 <sup>aA</sup>  | 9.68 ± 0.06 <sup>aA</sup>  | 9.64 ± 0.09 <sup>aA</sup>  | 9.80 ± 0.22 <sup>aA</sup>   | 9.61 ± 0.33 <sup>aA</sup>  | 10.14 ± 0.12 <sup>aA</sup> | 9.88 ± 0.09 <sup>aA</sup>  | 9.89 ± 0.02 <sup>aA</sup>  | 9.95 ± 0.04 <sup>aA</sup>  | 9.99 ± 0.01 <sup>aA</sup>  | 10.04 ± 0.03 <sup>aA</sup> |
| C18:1t          | 4.05 ± 0.02 <sup>aA</sup>  | 4.65 ± 0.06 <sup>aB</sup>   | 4.62 ± 0.03 <sup>aB</sup>   | 4.64 ± 0.04 <sup>aB</sup>  | 4.64 ± 0.02 <sup>aA</sup>  | 4.53 ± 0.03 <sup>aA</sup>  | 4.59 ± 0.01 <sup>aA</sup>  | 4.56 ± 0.05 <sup>aA</sup>  | 4.54 ± 0.09 <sup>aA</sup>   | 4.55 ± 0.13 <sup>aA</sup>  | 4.75 ± 0.06 <sup>aA</sup>  | 4.63 ± 0.05 <sup>aA</sup>  | 4.59 ± 0.01 <sup>aA</sup>  | 4.65 ± 0.03 <sup>aA</sup>  | 4.65 ± 0.05 <sup>aA</sup>  | 4.66 ± 0.02 <sup>aA</sup>  |
| C18:1c          | 20.03 ± 0.11 <sup>aA</sup> | 20.82 ± 0.15 <sup>aA</sup>  | 20.70 ± 0.12 <sup>aA</sup>  | 20.81 ± 0.05 <sup>aA</sup> | 20.45 ± 0.09 <sup>aA</sup> | 20.32 ± 0.17 <sup>aA</sup> | 20.39 ± 0.10 <sup>aA</sup> | 20.38 ± 0.21 <sup>aA</sup> | 20.36 ± 0.43 <sup>aA</sup>  | 20.24 ± 0.58 <sup>aA</sup> | 20.96 ± 0.23 <sup>aA</sup> | 20.56 ± 0.19 <sup>aA</sup> | 20.56 ± 0.03 <sup>aA</sup> | 20.75 ± 0.04 <sup>aA</sup> | 20.76 ± 0.08 <sup>aA</sup> | 20.63 ± 0.09 <sup>aA</sup> |
| C18:2t          | 0.83 ± 0.07 <sup>aA</sup>  | 0.86 ± 0.04 <sup>aA</sup>   | 0.85 ± 0.03 <sup>aA</sup>   | 0.76 ± 0.14 <sup>aA</sup>  | 0.85 ± 0.08 <sup>aA</sup>  | 0.84 ± 0.06 <sup>aA</sup>  | 0.81 ± 0.04 <sup>aA</sup>  | 0.89 ± 0.08 <sup>aA</sup>  | 0.79 ± 0.04 <sup>aA</sup>   | 0.84 ± 0.02 <sup>aA</sup>  | 0.84 ± 0.09 <sup>aA</sup>  | 0.86 ± 0.02 <sup>aA</sup>  | 0.84 ± 0.02 <sup>aA</sup>  | 0.84 ± 0.03 <sup>aA</sup>  | 0.86 ± 0.02 <sup>aA</sup>  | 0.89 ± 0.05 <sup>aA</sup>  |
| C18:2c          | 2.99 ± 0.05 <sup>aA</sup>  | 2.95 ± 0.01 <sup>aA</sup>   | 2.96 ± 0.01 <sup>aA</sup>   | 2.96 ± 0.01 <sup>aA</sup>  | 2.91 ± 0.01 <sup>aA</sup>  | 2.91 ± 0.03 <sup>aA</sup>  | 2.90 ± 0.01 <sup>aA</sup>  | 2.90 ± 0.02 <sup>aA</sup>  | 2.90 ± 0.06 <sup>aA</sup>   | 2.93 ± 0.10 <sup>aA</sup>  | 3.00 ± 0.03 <sup>aA</sup>  | 2.93 ± 0.02 <sup>aA</sup>  | 2.93 ± 0.01 <sup>aA</sup>  | 2.93 ± 0.03 <sup>aA</sup>  | 2.97 ± 0.04 <sup>aA</sup>  | 2.93 ± 0.01 <sup>aA</sup>  |
| C18:3n-6        | 0.06 ± 0.01 <sup>aA</sup>  | 0.07 ± 0.01 <sup>aA</sup>   | 0.07 ± 0.01 <sup>aA</sup>   | 0.07 ± 0.01 <sup>aA</sup>  | 0.06 ± 0.02 <sup>aA</sup>  | 0.07 ± 0.00 <sup>aA</sup>  | 0.08 ± 0.01 <sup>aA</sup>  | 0.08 ± 0.01 <sup>aA</sup>  | 0.07 ± 0.00 <sup>aA</sup>   | 0.08 ± 0.01 <sup>aA</sup>  | 0.07 ± 0.00 <sup>aA</sup>  | 0.07 ± 0.00 <sup>aA</sup>  | 0.07 ± 0.00 <sup>aA</sup>  | 0.08 ± 0.00 <sup>aA</sup>  | 0.08 ± 0.01 <sup>aA</sup>  | 0.07 ± 0.01 <sup>aA</sup>  |
| C18:3n-3        | 0.33 ± 0.00 <sup>aA</sup>  | 0.28 ± 0.00 <sup>aA</sup>   | 0.28 ± 0.01 <sup>aA</sup>   | 0.24 ± 0.07 <sup>aA</sup>  | 0.29 ± 0.00 <sup>aA</sup>  | 0.28 ± 0.00 <sup>aA</sup>  | 0.28 ± 0.00 <sup>aA</sup>  | 0.27 ± 0.00 <sup>aA</sup>  | 0.28 ± 0.01 <sup>aA</sup>   | 0.27 ± 0.01 <sup>aA</sup>  | 0.29 ± 0.00 <sup>aA</sup>  | 0.28 ± 0.01 <sup>aA</sup>  | 0.28 ± 0.00 <sup>aA</sup>  | 0.29 ± 0.01 <sup>aA</sup>  | 0.28 ± 0.00 <sup>aA</sup>  | 0.28 ± 0.00 <sup>aA</sup>  |
| C20:0           | 0.19 ± 0.01 <sup>aA</sup>  | 0.21 ± 0.00 <sup>aA</sup>   | 0.21 ± 0.01 <sup>aA</sup>   | 0.22 ± 0.02 <sup>aA</sup>  | 0.22 ± 0.01 <sup>aA</sup>  | 0.20 ± 0.01 <sup>aA</sup>  | 0.21 ± 0.01 <sup>aA</sup>  | 0.20 ± 0.00 <sup>aA</sup>  | 0.20 ± 0.01 <sup>aA</sup>   | 0.20 ± 0.01 <sup>aA</sup>  | 0.21 ± 0.00 <sup>aA</sup>  | 0.21 ± 0.00 <sup>aA</sup>  | 0.21 ± 0.00 <sup>aA</sup>  | 0.23 ± 0.02 <sup>aA</sup>  | 0.21 ± 0.00 <sup>aA</sup>  | 0.22 ± 0.01 <sup>aA</sup>  |
| C20:1           | 0.22 ± 0.00 <sup>aA</sup>  | 0.24 ± 0.01 <sup>aAB</sup>  | 0.24 ± 0.00 <sup>aAB</sup>  | 0.25 ± 0.02 <sup>aB</sup>  | 0.25 ± 0.01 <sup>aA</sup>  | 0.24 ± 0.01 <sup>aA</sup>  | 0.23 ± 0.01 <sup>aA</sup>  | 0.23 ± 0.01 <sup>aA</sup>  | 0.23 ± 0.01 <sup>aA</sup>   | 0.23 ± 0.01 <sup>aA</sup>  | 0.25 ± 0.01 <sup>aA</sup>  | 0.24 ± 0.01 <sup>aA</sup>  | 0.23 ± 0.00 <sup>aA</sup>  | 0.16 ± 0.00 <sup>aA</sup>  | 0.17 ± 0.00 <sup>aA</sup>  | 0.17 ± 0.01 <sup>aA</sup>  |
| C22:0           | 0.06 ± 0.00 <sup>aA</sup>  | 0.07 ± 0.00 <sup>aA</sup>   | 0.07 ± 0.00 <sup>aA</sup>   | 0.07 ± 0.00 <sup>aA</sup>  | 0.06 ± 0.02aA              | 0.07 ± 0.00aA              | 0.06 ± 0.00 <sup>aA</sup>  | 0.06 ± 0.00 <sup>aA</sup>  | 0.06 ± 0.00 <sup>aA</sup>   | 0.07 ± 0.00 <sup>aA</sup>  | 0.07 ± 0.00 <sup>aA</sup>  | 0.07 ± 0.00aA              | 0.07 ± 0.00aA              | 0.29 ± 0.00 <sup>aA</sup>  | 0.30 ± 0.00 <sup>aA</sup>  | 0.30 ± 0.00 <sup>aA</sup>  |
| C24:0           | 0.15 ± 0.02 <sup>aA</sup>  | 0.10 ± 0.00 <sup>aA</sup>   | 0.10 ± 0.01 <sup>aA</sup>   | 0.11 ± 0.01 <sup>aA</sup>  | 0.16 ± 0.03 <sup>aA</sup>  | 0.14 ± 0.03 <sup>aA</sup>  | 0.12 ± 0.01 <sup>aA</sup>  | 0.11 ± 0.01 <sup>aA</sup>  | 0.08 ± 0.00 <sup>aA</sup>   | 0.09 ± 0.01 <sup>aA</sup>  | 0.10 ± 0.00 <sup>aA</sup>  | 0.10 ± 0.01 <sup>aA</sup>  | 0.10 ± 0.01 <sup>aA</sup>  | 0.10 ± 0.01 <sup>aA</sup>  | 0.11 ± 0.01 <sup>aA</sup>  | 0.11 ± 0.02 <sup>aA</sup>  |
| Saturated       | 64.60 ± 0.31 <sup>aB</sup> | 63.26 ± 0.37 <sup>aAB</sup> | 63.50 ± 0.19 <sup>aAB</sup> | 63.65 ± 0.22 <sup>aA</sup> | 63.61 ± 0.16 <sup>aA</sup> | 63.96 ± 0.43 <sup>aA</sup> | 63.78 ± 0.12 <sup>aA</sup> | 63.76 ± 0.07 <sup>aA</sup> | 64.04 ± 0.81 <sup>aA</sup>  | 64.06 ± 0.78 <sup>aA</sup> | 62.91 ± 0.22 <sup>aA</sup> | 63.75 ± 0.14 <sup>aA</sup> | 63.75 ± 0.02 <sup>aA</sup> | 64.12 ± 0.16 <sup>aA</sup> | 63.88 ± 0.27 <sup>aA</sup> | 64.07 ± 0.08 <sup>aA</sup> |
| Monounsaturated | 25.05 ± 0.11 <sup>aA</sup> | 25.79 ± 0.21 <sup>aA</sup>  | 25.64 ± 0.12 <sup>aA</sup>  | 25.74 ± 0.06 <sup>aA</sup> | 25.37 ± 0.10 <sup>aA</sup> | 25.32 ± 0.18 <sup>aA</sup> | 25.44 ± 0.04 <sup>aA</sup> | 25.33 ± 0.22 <sup>aA</sup> | 25.32 ± 0.45 <sup>aA</sup>  | 25.26 ± 0.54 <sup>aA</sup> | 25.91 ± 0.25 <sup>aA</sup> | 25.52 ± 0.18 <sup>aA</sup> | 25.46 ± 0.02 <sup>aA</sup> | 25.63 ± 0.10 <sup>aA</sup> | 25.61 ± 0.09 <sup>aA</sup> | 25.47 ± 0.09 <sup>aA</sup> |
| Polyunsaturated | 4.35 ± 0.13 <sup>aA</sup>  | 4.23 ± 0.06 <sup>aA</sup>   | 4.23 ± 0.07 <sup>aA</sup>   | 4.18 ± 0.05 <sup>aA</sup>  | 4.36 ± 0.18 <sup>aA</sup>  | 4.24 ± 0.17 <sup>aA</sup>  | 4.12 ± 0.03 <sup>aA</sup>  | 4.14 ± 0.05 <sup>aA</sup>  | 4.20 ± 0.19 <sup>aA</sup>   | 4.10 ± 0.14 <sup>aA</sup>  | 4.37 ± 0.03 <sup>aA</sup>  | 4.17 ± 0.06 <sup>aA</sup>  | 4.16 ± 0.02 <sup>aA</sup>  | 3.73 ± 0.03 <sup>aA</sup>  | 3.77 ± 0.06 <sup>aA</sup>  | 3.72 ± 0.01 <sup>aA</sup>  |
